# Supplementary material for: Transcriptional analysis of the cell division-related ssg genes in Streptomyces coelicolor reveals direct control of ssgR by AtrA
Source: PubMed Central journal article supplement (PMC4457907; doi:10.1007/s10482-015-0479-2), 2015-05-23
Supplement: 10482_2015_479_MOESM1_ESM.pdf [file 10482_2015_479_MOESM1_ESM.pdf]

**Transcriptional analysis of the cell division-related *ssg* genes in *Streptomyces coelicolor* reveals direct control of *ssgR* by AtrA**

Songhee H. Kim<sup>1, \*</sup>, Bjørn A. Traag<sup>2, \*</sup>, Ayad H. Hasan<sup>3, \*</sup>, Kenneth J. McDowall<sup>3</sup>, Byung-Gee Kim<sup>1</sup> and Gilles P. van Wezel<sup>4, #</sup>

<sup>1</sup> School of Chemical and Biological Engineering and Institute of Molecular Biology and Genetics, Seoul National University, Kwanak-gu, Seoul 151-744, Korea;

<sup>2</sup> Bayer CropScience LP, Biologics, 890 Embarcadero Drive, West Sacramento, California, 95605, USA;

<sup>3</sup> Astbury Centre for Structural Molecular Biology, Faculty of Biological Sciences, University of Leeds, Leeds, LS2 9JT, United Kingdom;

<sup>4</sup> Molecular Biotechnology, Institute of Biology, Leiden University, PO Box 9505, 2300RA, Leiden, The Netherlands;

\* these authors contributed equally to the work.

# To whom correspondence should be addressed. Tel: +31 71527430; email: [g.wezel@biology.leidenuniv.nl](mailto:g.wezel@biology.leidenuniv.nl)

**Table S1. *Streptomyces* strains used in this study.**

| <b>Strains</b>             | <b>Description</b>                   | <b>Reference</b>               |
|----------------------------|--------------------------------------|--------------------------------|
| <i>S. coelicolor</i> M145  | Wild type <i>S. coelicolor</i> A3(2) | (Kieser <i>et al.</i> , 2000)  |
| <i>S. coelicolor</i> J2401 | M145 $\Delta$ <i>whiA</i>            | (Flärdh <i>et al.</i> , 1999)  |
| <i>S. coelicolor</i> J2402 | M145 $\Delta$ <i>whiB</i>            | (Flärdh <i>et al.</i> , 1999)  |
| <i>S. coelicolor</i> J2400 | M145 $\Delta$ <i>whiG</i>            | (Flärdh <i>et al.</i> , 1999)  |
| <i>S. coelicolor</i> J2210 | M145 $\Delta$ <i>whiH</i>            | (Ryding <i>et al.</i> , 1999)  |
| <i>S. coelicolor</i> J2450 | M145 $\Delta$ <i>whiI</i>            | (Ainsa <i>et al.</i> , 1999)   |
| <i>S. coelicolor</i> C77   | M145 <i>whiJ</i> locus 77            | (Ryding <i>et al.</i> , 1999)  |
| <i>S. coelicolor</i> L645  | M145 $\Delta$ <i>atrA</i>            | (Uguru <i>et al.</i> , 2005)   |
| <i>S. coelicolor</i> GSB1  | M145 $\Delta$ <i>ssgB</i>            | (Keijser <i>et al.</i> , 2003) |
| <i>S. coelicolor</i>       | M145 $\Delta$ <i>slbR</i>            | (Yang <i>et al.</i> , 2012a)   |

**Table S2. Oligonucleotides used in this study.**

| Primer name                                 | DNA sequence (5' to 3')*                  | 5' end            | Relative to       |
|---------------------------------------------|-------------------------------------------|-------------------|-------------------|
| <i>Primers for semi-quantitative RT-PCR</i> |                                           |                   |                   |
| PssgA-for                                   | <u>GTCGAATTC</u> ACCATGGCGCGCTGGCGCGAC    | -619              | <i>ssgA</i>       |
| PssgA-rev                                   | CTGGGATCCCCGGGTCTCGTAGCGCAGCTC            | +70               | <i>ssgA</i>       |
| PssgR-for                                   | <u>GTCGAATTC</u> GACTGCCGTGGTGGGTGAAGTG   | -512              | <i>ssgR</i>       |
| PssgR-rev                                   | <u>GTCGGATCC</u> GCCCGCTGCACGGAGCCGATC    | +12               | <i>ssgR</i>       |
| PssgB-rev                                   | <u>GTCCGAGCTC</u> GCTCTCCCGAGTGATCACTGGTC | -592              | <i>ssgB</i>       |
| PssgB-for                                   | <u>GTCGGATCC</u> GCAGCTGACCGTGGTGTGAT     | +21               | <i>ssgB</i>       |
| PssgC-rev                                   | <u>GTCGGAATTC</u> GTCGACGCCGGGTTACCCGAGGT | -216              | <i>ssgC</i>       |
| PssgC-for                                   | <u>GTCGGATCC</u> TGCACGACCAGGGTCTTGTGCAC  | +35               | <i>ssgC</i>       |
| PssgD-for                                   | <u>GTCGAATTC</u> GTCCCCTGCGTGCCTGCTTCCC   | -291              | <i>ssgD</i>       |
| PssgD-rev                                   | <u>GTCGGATCC</u> ACTGCTCGATGACGGTGGAC     | +22               | <i>ssgD</i>       |
| PssgE-for                                   | <u>GTCGAATTC</u> GAGGTCGGGGCGTTGATGAATC   | -223              | <i>ssgE</i>       |
| PssgE-rev                                   | <u>GTCGGATCC</u> AGGATGTGGGCTCGTGCCTAC    | +38               | <i>ssgE</i>       |
| PssgF-for                                   | <u>GTCGAATTC</u> CGCGTGGGCCTGACCGGACATGAC | -401              | <i>ssgF</i>       |
| PssgF-rev                                   | <u>GTCGGATCC</u> CTCGAGAGCGCCCGTCATCTG    | +99               | <i>ssgF</i>       |
| PssgG-for                                   | <u>GTCGAATTC</u> CCTCGACCGGGTCCTCGTCAAG   | -467              | <i>ssgG</i>       |
| PssgG-rev                                   | <u>GTCGGATCC</u> AGGACGAGCCTGAGCTCCAG     | +62               | <i>ssgG</i>       |
| <i>Primers for qRT-PCR (atrA mutant)</i>    |                                           |                   |                   |
| SCO3926p1                                   | GACCGCACCGACAAGCTG                        | +297              | <i>ssgA</i>       |
| SCO3926p2                                   | GCTCTGTTCCCTCCGCCAG                       | +401              | <i>ssgA</i>       |
| SCO6722p1                                   | GGGAGAAGGTCCAGCAGA                        | +171              | <i>ssgD</i>       |
| SCO6722p2                                   | GCCACCCTGCACTACGAC                        | +72               | <i>ssgD</i>       |
| SCO3925p1                                   | GCTGTTCTTCTCGGTGA                         | +155              | <i>ssgR</i>       |
| SCO3925p2                                   | CCGGTACGTGGCGTAGTA                        | +290              | <i>ssgR</i>       |
| SCO5085p1                                   | TACTTCGCCCTGATCGAC                        | +279              | <i>actII-ORF4</i> |
| SCO5085p2                                   | CTCGCCAGAGATCCAGTC                        | +417              | <i>actII-ORF4</i> |
| SCO4735p1                                   | GGCAAGTGGAAAGGTCAAC                       | +192              | <i>rpsL</i>       |
| SCO4735p2                                   | GTCGTAGCGGTTGTCCAG                        | +302              | <i>rpsL</i>       |
| SCO5087p1                                   | CAACGCGTACCACATGAC                        | +938              | <i>actI</i>       |
| SCO5087p2                                   | GTGCGCGTTGATGTAGTC                        | +1055             | <i>actI</i>       |
| <i>Primers for qRT-PCR (slbR mutant)</i>    |                                           |                   |                   |
| 5S rRNA_RTL                                 | GTCATAGCGTAGGGGAAACG                      | +11               | 5S rRNA           |
| 5S rRNA_RTR                                 | GGCGTCCTACTCTCCCACAG                      | +104              | 5S rRNA           |
| <i>ssgA</i> _RTL                            | TGTCCGAGGAGCTCTTTTC                       | +17               | <i>ssgA</i>       |
| <i>ssgA</i> _RTR                            | GACCTGAAGTCGGATCAGCA                      | +243              | <i>ssgA</i>       |
| <i>ssgB</i> _RTL                            | CTCGTTGTGTCGAGCGAGT                       | +36 <sup>a</sup>  | <i>ssgB</i>       |
| <i>ssgB</i> _RTR                            | AGCTGAGAGCGATGCACAC                       | +267 <sup>a</sup> | <i>ssgB</i>       |
| <i>ssgG</i> _RTL                            | AGCTCAGGCTCGTCCTGTC                       | +46               | <i>ssgG</i>       |
| <i>ssgG</i> _RTR                            | GTCTTCGACGGCCACACC                        | +250              | <i>ssgG</i>       |
| <i>ssgR</i> _RTL                            | CGTGTACTACGCCACGTACC                      | +269 <sup>b</sup> | <i>ssgR</i>       |
| <i>ssgR</i> _RTR                            | AGCCGCTTCAGGAGACTGT                       | +508 <sup>b</sup> | <i>ssgR</i>       |
| <i>Primers for DACA and EMSA</i>            |                                           |                   |                   |
| sco0608_pETma                               | AATAGAATTC ATGTCCGAGAGCACGATGC            |                   |                   |
| sco0608_pET24ma                             | ATATAAGCTTTCAGCTGCCGTTCCGCGCGG            |                   |                   |
| <i>ssgA</i> for                             | TGGCCATCTCACTGCCCTCC                      |                   |                   |
| <i>ssgA</i> _Rev_biotin                     | CGCAGCTCCACCGGGATGCGG                     |                   |                   |

|                                              |                              |      |                   |
|----------------------------------------------|------------------------------|------|-------------------|
| ssgB_For                                     | TCGTCCGTCCCCGTACGGTCT        |      |                   |
| ssgB_Rev_biotinylated                        | GCAGGTGCAGCTCGCAGCTGA        |      |                   |
| ssgG_For                                     | TCGTCCCGTATCTGCTCGG          |      |                   |
| ssgG_Rev_biotin                              | AGCTCCAGCTCGCGTTCCACG        |      |                   |
| ssgR_For                                     | GTGAGAGCCGTGGGACAC           |      |                   |
| ssgR_Rev_biotin                              | CACGGAGCCGATCAGAGT           |      |                   |
| ssgR_EM SAF                                  | FAMGCGCAGCGACTGGTGAGAG       |      |                   |
| ssgR_EM SAR                                  | GTGCGCCATTCGCGGAGTC          |      |                   |
| <i>Primers for EMSA (fluorescent probes)</i> |                              |      |                   |
| SCO4119p1                                    | CTACACACCGTGGGAAAGAA         | -305 | SCO4119           |
| SCO4119p2                                    | FAM-AGCCGCGGGAACCAACGTCG     | -126 | SCO4119           |
| ssgRp1                                       | GTGAGAGCCGTGGGACAC           | -321 | <i>ssgR</i>       |
| ssgRp2                                       | FAM-AGCGAATGCGGTGTCAG        | -97  | <i>ssgR</i>       |
| actII-4(s2)p1                                | TTGGGACGTGTCCATGTAATCACC     | +15  | <i>actII-ORF4</i> |
| actII-4(s2)p2                                | FAM-TCGTGCCGCCTGAGGAGCAGCAGC | +115 | <i>actII-ORF4</i> |

\* Underlined sequences indicate non-homologues sequence added to create restriction sites (in italics) at the ends of the PCR fragments. Restriction sites: GGATCC, BamHI; GAATTC, EcoRI; AAGCTT, HindIII; TCTAGA, XbaI; CTCGAG, XhoI. Positions are relative to the translational start of the indicated gene (for *ssgAsg* and *ssgAsc* we refer to the first of the three possible ATG start sites as +1).

<sup>a</sup> based on the re-annotated translational start site for *ssgB*, which lies 66 nt downstream of the start predicted in StrepDB.

<sup>b</sup> based on the translational start site predicted in StrepDB. The true start of *ssgR* is most likely further upstream (see the manuscript).

**Table S3. Identification of peptides by DACA assay.**

| Protein<br>(SCO Reference) <i>a</i> | ID | peptide (aa sequence)             | MH+ <i>b</i> | z | Time<br>point | Xcorrelation score (peptide ID) <i>c</i> |                  |                |                     |
|-------------------------------------|----|-----------------------------------|--------------|---|---------------|------------------------------------------|------------------|----------------|---------------------|
|                                     |    |                                   |              |   |               | <i>ssgA</i>                              | <i>ssgB</i>      | <i>ssgG</i>    | <i>ssgR</i>         |
| SlbR<br>(SCO0608)                   | 1  | R.SAAEVTTALSEAHSGR.T              | 1586,8       | 2 | 48h           | 20.25 (1,3)                              | 15.18* (1,3)     |                |                     |
|                                     | 2  | K.VTIPGFLTFER.T                   | 1279,7       | 2 | 72h           |                                          |                  |                |                     |
|                                     | 3  | R.ATAQPTLVLEVR.E                  | 1297,7       | 2 |               |                                          |                  |                |                     |
| AdpA<br>(SCO2792)                   | 4  | R.LLETSYVDEVAGR.C                 | 1653,8       | 2 | 48h           | 10.17 (4)                                | 20.17 (4,6)      |                |                     |
|                                     | 5  | R.LLVCAGEDGPLR.T                  | 1299,7       | 2 | 72h           | 30.2 (4,5,6)                             | 120.20 (4,5)     | 20.17* (4,5,6) |                     |
|                                     | 6  | R.TTGGLELTAPQGLEAISR.A            | 1814,0       | 2 |               |                                          |                  |                |                     |
| HupA<br>(SCO2950)                   | 7  | R.SELVAALADR.A                    | 1044,6       | 2 | 48h           | 15.21* (7,9,10)                          | 15.23* (7,9)     | 10.21* (9)     | 50.25 (7,8,9,10)    |
|                                     | 8  | K.VTIPGFLTFER.T                   | 1279,7       | 2 | 72h           | 20.21 (7,9)                              | 15.22* (7,9)     | 10.22* (7,9)   | 40.25 (7,8,9,10)    |
|                                     | 9  | R.NPQTGEPIQIPAGYSVK.V             | 1798,9       | 2 |               |                                          |                  |                |                     |
|                                     | 10 | R.TARNPQTGEPIQIPAGYSVK.V          | 2127,1       | 3 |               |                                          |                  |                |                     |
| FruR<br>(SCO3198)                   | 11 | R.MAAAIPPDASLTVVTHSLPIAAR.L       | 2302,3       | 3 | 48h           | 10.22 (11)                               | 20.26 (11,14)    | 10.15 (11)     | 20.22 (11,12)       |
|                                     | 12 | R.LADHPGIQLHIVGGR.V               | 1582,9       | 3 | 72h           | 20.18 (11/13)                            |                  | 10.19 (11)     |                     |
|                                     | 13 | R.ADVAVVAANGFSVEHGLTTPDLAEAAVKR.A | 2908,5       | 3 |               |                                          |                  |                |                     |
|                                     | 14 | R.AALAELEPAEGLLILDAGSTVAR.M       | 2139,2       | 2 |               |                                          |                  |                |                     |
| Lsr2 domain protein<br>(SCO3375)    | 15 | K.TYEIDLTTANADK.L                 | 1454,7       | 2 | 48h           |                                          |                  |                |                     |
|                                     | 16 | K.TYEIDLTTANADKLR.G               | 1723,9       | 2 | 72h           |                                          | 20.20 (15,16)    |                |                     |
| sugar diacid regulator<br>(SCO3606) | 17 | R.FGLVLSHAHAVAVAQGPPEAYDDTAPVTR.V | 2892,5       | 3 | 48h           |                                          |                  |                |                     |
|                                     | 18 | R.AADMLVYPVLAR.D                  | 1318,7       | 2 |               |                                          |                  |                |                     |
|                                     | 19 | RVAVGRPQSGAGGVVHSYEEALTTLEADRL    | 2982,5       | 3 | 72h           | 10.19(19)                                | 10.16 (17)       |                | 10.15(18)           |
| XRE-family protein<br>(SCO3859)     | 20 | R.LIDDLGLNQAR.L                   | 1227,7       | 2 | 48h           |                                          |                  |                |                     |
|                                     | 21 | R.VQLLQDLAQVADGVSVAEATER.M        | 2428,2       | 3 | 72h           | 20.17 (20,21)                            | 30.26 (20,21)    |                |                     |
|                                     | 22 | R.SVAAAGDIIDAADSLSSHPLEAEFLR.V    | 2742,4       | 3 |               |                                          |                  |                |                     |
| AtrA<br>(SCO4118)                   | 23 | R.TALGQEDEPWSALS.R.F              | 1659,7       | 2 | 48h           |                                          |                  |                | 30.22 (23,24,25)    |
|                                     | 24 | R.EVFGELGYGAPMEDVAR.R             | 1839,9       | 2 | 72h           |                                          |                  |                | 40.22 (23,24,25,26) |
|                                     | 25 | R.LLDILLEGLR.S                    | 1154,7       | 2 |               |                                          |                  |                |                     |
|                                     | 26 | R.VGVSDDAGTDGGVGGPGAAAAGDPR.V     | 2126,0       | 3 |               |                                          |                  |                |                     |
| LexA, SOS regulator<br>(SCO5803)    | 27 | R.GSDQAASVQPTDTAGKPAASYVPLVGR.I   | 2643,3       | 3 | 48h           |                                          | 20.24 (27,28)    |                |                     |
|                                     | 28 | R.IAAGGPILAEESVEDVFPLPR.Q         | 2180,2       | 2 | 72h           |                                          | 30.22 (27,28,29) |                |                     |
|                                     | 29 | R.RQPVAENGDIVAAMLDEATVTKR.F       | 2440,3       | 3 |               |                                          |                  |                |                     |

**Footnotes**

*a* Refers to the StrepDB database reference number

*b* MH+: Calculated m/z of the peptide with z = 1

*c* XCorrelation score: cross-correlation peptide score by SEQUEST database search. Peptide numbers between brackets (Refer to column peptide ID). Default threshold of 10 was used in identifying the peptides.

\* averaged Xcorr for peptides found in both of two independent experiments
